# Supplementary material
Source: Springer Nature journal article supplement (https://www.springermedizin.de/resource/supplementary/40170_2013_24_MOESM2_ESM.pdf/25787662)

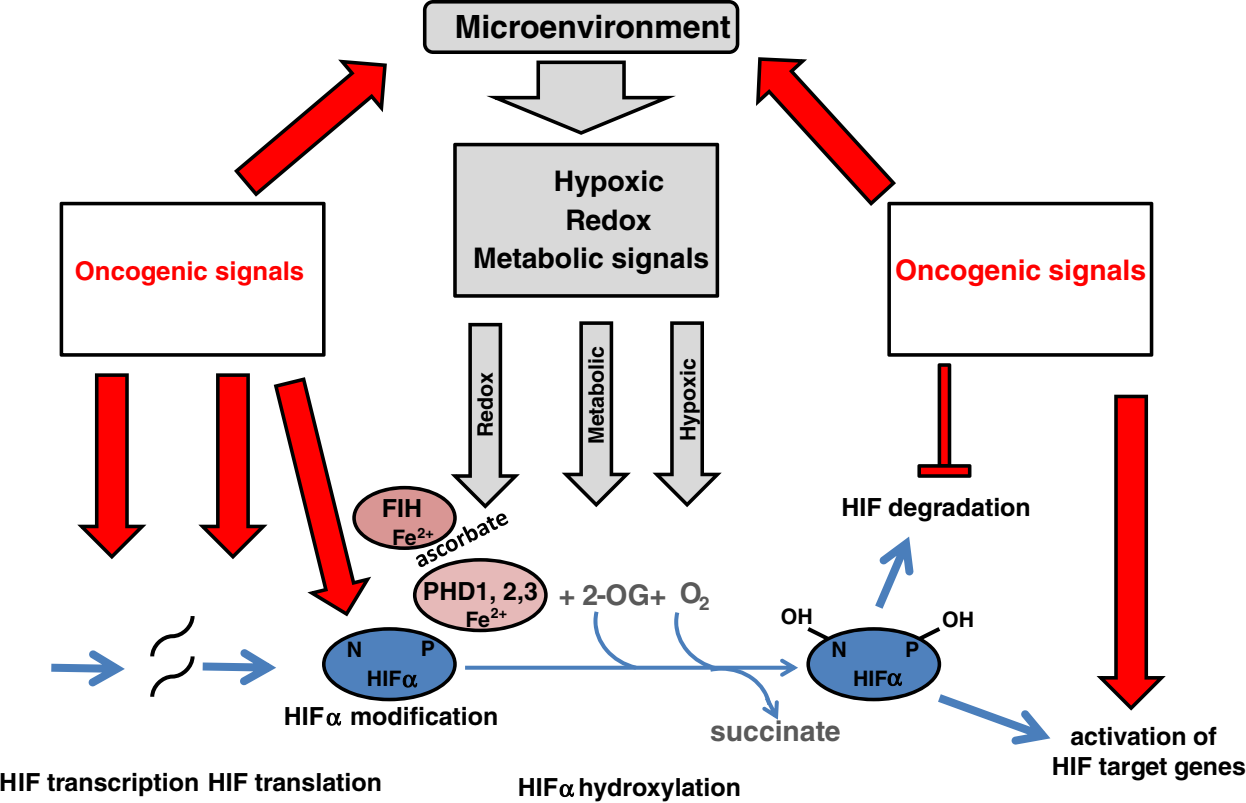

Supplement: MOESM2 [file 25787662]
